# Supplementary material
Source: Springer Nature journal article supplement (https://www.springermedizin.de/resource/supplementary/13098_2014_358_MOESM1_ESM.pdf/9671166)

**A**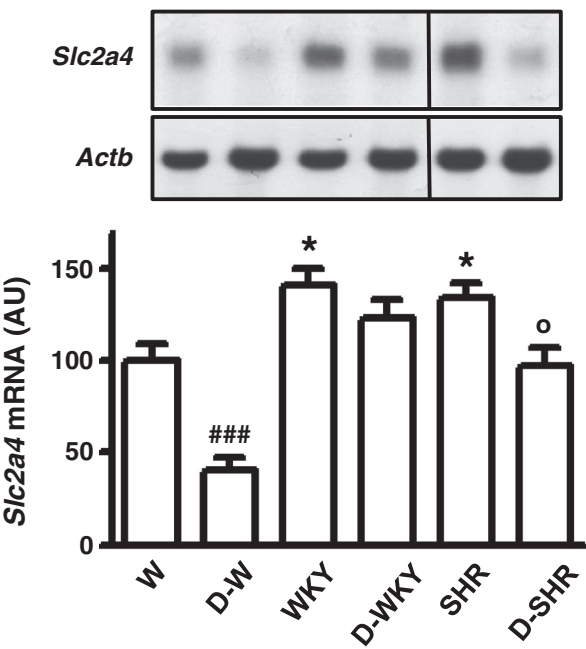**B**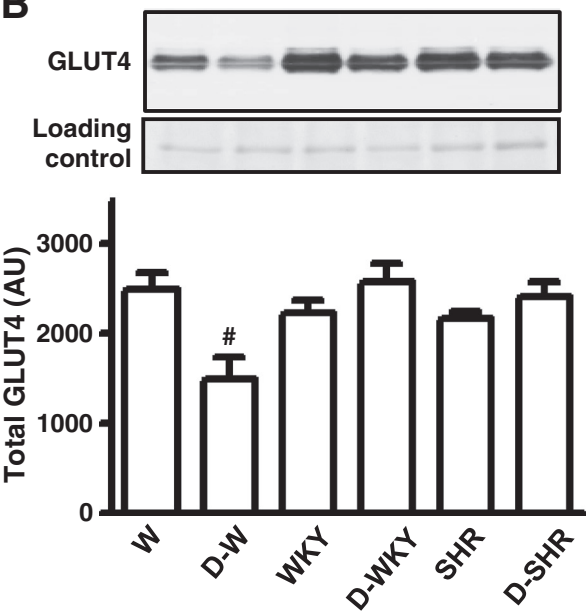**C**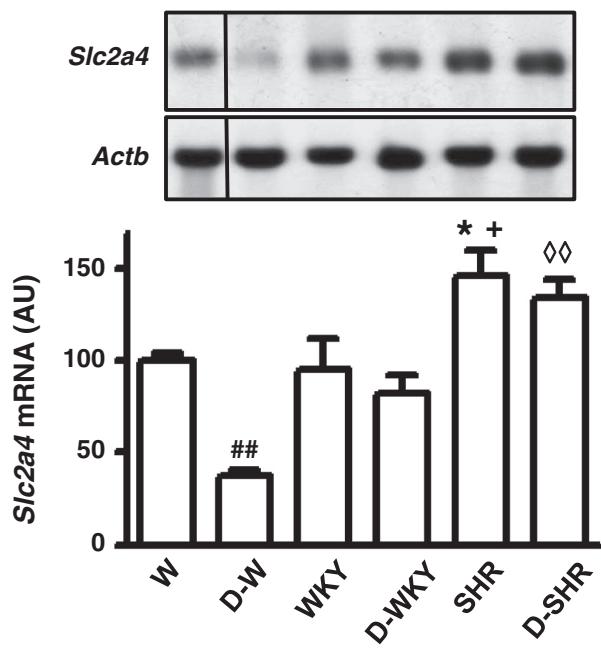**D**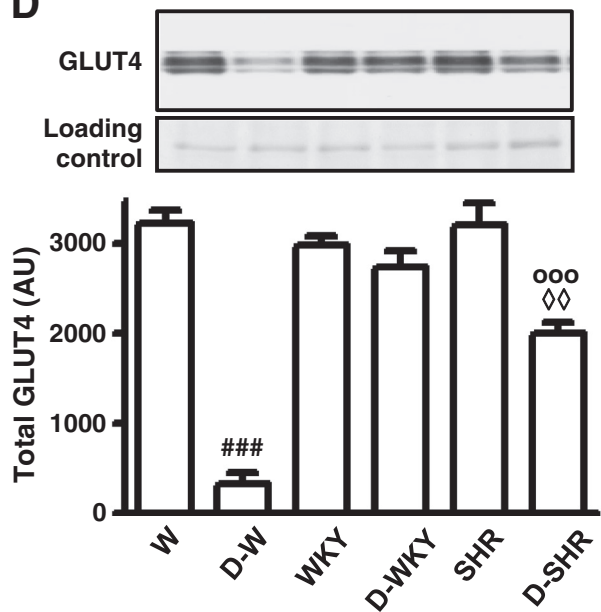

Supplement: MOESM1 [file 9671166]
